# Supplementary material
Source: publisher figshare collection journal article supplement (https://acs.figshare.com/ndownloader/files/4736920)
Supplement: Supplementary file 1 [file 4736920]

  
data_f40330b 
  
_audit_creation_method            SHELXL-97 
_chemical_name_systematic 
; 
 ? 
; 
_chemical_name_common             ? 
_chemical_melting_point           ? 
_chemical_formula_moiety          ? 
_chemical_formula_sum 
 'C60 H54 N9 O3 Yb3' 
_chemical_formula_weight          1468.24 
  
loop_ 
 _atom_type_symbol 
 _atom_type_description 
 _atom_type_scat_dispersion_real 
 _atom_type_scat_dispersion_imag 
 _atom_type_scat_source 
 'C'  'C'   0.0033   0.0016 
 'International Tables Vol C Tables 4.2.6.8 and 6.1.1.4' 
 'H'  'H'   0.0000   0.0000 
 'International Tables Vol C Tables 4.2.6.8 and 6.1.1.4' 
 'N'  'N'   0.0061   0.0033 
 'International Tables Vol C Tables 4.2.6.8 and 6.1.1.4' 
 'O'  'O'   0.0106   0.0060 
 'International Tables Vol C Tables 4.2.6.8 and 6.1.1.4' 
 'Yb'  'Yb'  -0.3850   5.5486 
 'International Tables Vol C Tables 4.2.6.8 and 6.1.1.4' 
  
_symmetry_cell_setting            Rhombohedral 
_symmetry_space_group_name_H-M    R-3 
  
loop_ 
 _symmetry_equiv_pos_as_xyz 
 'x, y, z' 
 '-y, x-y, z' 
 '-x+y, -x, z' 
 'x+2/3, y+1/3, z+1/3' 
 '-y+2/3, x-y+1/3, z+1/3' 
 '-x+y+2/3, -x+1/3, z+1/3' 
 'x+1/3, y+2/3, z+2/3' 
 '-y+1/3, x-y+2/3, z+2/3' 
 '-x+y+1/3, -x+2/3, z+2/3' 
 '-x, -y, -z' 
 'y, -x+y, -z' 
 'x-y, x, -z' 
 '-x+2/3, -y+1/3, -z+1/3' 
 'y+2/3, -x+y+1/3, -z+1/3' 
 'x-y+2/3, x+1/3, -z+1/3' 
 '-x+1/3, -y+2/3, -z+2/3' 
 'y+1/3, -x+y+2/3, -z+2/3' 
 'x-y+1/3, x+2/3, -z+2/3' 
  
_cell_length_a                    30.451(5) 
_cell_length_b                    30.451(5) 
_cell_length_c                    13.919(3) 
_cell_angle_alpha                 90.00 
_cell_angle_beta                  90.00 
_cell_angle_gamma                 120.00 
_cell_volume                      11178(4) 
_cell_formula_units_Z             6 
_cell_measurement_temperature     298(2) 
_cell_measurement_reflns_used     992 
_cell_measurement_theta_min       2.513 
_cell_measurement_theta_max       19.247 
  
_exptl_crystal_description        ? 
_exptl_crystal_colour             ? 
_exptl_crystal_size_max           0.25 
_exptl_crystal_size_mid           0.15 
_exptl_crystal_size_min           0.10 
_exptl_crystal_density_meas       ? 
_exptl_crystal_density_diffrn     1.309 
_exptl_crystal_density_method     'not measured' 
_exptl_crystal_F_000              4266 
_exptl_absorpt_coefficient_mu     3.774 
_exptl_absorpt_correction_type    none 
_exptl_absorpt_correction_T_min   0.4522 
_exptl_absorpt_correction_T_max   0.7041 
_exptl_absorpt_process_details    ? 
  
_exptl_special_details 
; 
 ? 
; 
  
_diffrn_ambient_temperature       298(2) 
_diffrn_radiation_wavelength      0.71073 
_diffrn_radiation_type            MoK\a 
_diffrn_radiation_source          'fine-focus sealed tube' 
_diffrn_radiation_monochromator   graphite 
_diffrn_measurement_device_type   'CCD area detector' 
_diffrn_measurement_method        'phi and omega scans' 
_diffrn_detector_area_resol_mean  ? 
_diffrn_standards_number          ? 
_diffrn_standards_interval_count  ? 
_diffrn_standards_interval_time   ? 
_diffrn_standards_decay_%         5.50 
_diffrn_reflns_number             15667 
_diffrn_reflns_av_R_equivalents   0.0711 
_diffrn_reflns_av_sigmaI/netI     0.0874 
_diffrn_reflns_limit_h_min        -17 
_diffrn_reflns_limit_h_max        36 
_diffrn_reflns_limit_k_min        -36 
_diffrn_reflns_limit_k_max        27 
_diffrn_reflns_limit_l_min        -15 
_diffrn_reflns_limit_l_max        16 
_diffrn_reflns_theta_min          1.65 
_diffrn_reflns_theta_max          25.01 
_reflns_number_total              4378 
_reflns_number_gt                 2035 
_reflns_threshold_expression      >2sigma(I) 
  
_computing_data_collection        'Bruker SMART' 
_computing_cell_refinement        'Bruker SMART' 
_computing_data_reduction         'Bruker SHELXTL' 
_computing_structure_solution     'SHELXS-97 (Sheldrick, 1990)' 
_computing_structure_refinement   'SHELXL-97 (Sheldrick, 1997)' 
_computing_molecular_graphics     'Bruker SHELXTL' 
_computing_publication_material   'Bruker SHELXTL' 
  
_refine_special_details 
; 
 Refinement of F^2^ against ALL reflections.  The weighted R-factor wR and 
 goodness of fit S are based on F^2^, conventional R-factors R are based 
 on F, with F set to zero for negative F^2^. The threshold expression of 
 F^2^ > 2sigma(F^2^) is used only for calculating R-factors(gt) etc. and is 
 not relevant to the choice of reflections for refinement.  R-factors based 
 on F^2^ are statistically about twice as large as those based on F, and R- 
 factors based on ALL data will be even larger. 
; 
  
_refine_ls_structure_factor_coef  Fsqd 
_refine_ls_matrix_type            full 
_refine_ls_weighting_scheme       calc 
_refine_ls_weighting_details 
 'calc w=1/[\s^2^(Fo^2^)+(0.1142P)^2^+0.0000P] where P=(Fo^2^+2Fc^2^)/3' 
_atom_sites_solution_primary      direct 
_atom_sites_solution_secondary    difmap 
_atom_sites_solution_hydrogens    geom 
_refine_ls_hydrogen_treatment     mixed 
_refine_ls_extinction_method      none 
_refine_ls_extinction_coef        ? 
_refine_ls_number_reflns          4378 
_refine_ls_number_parameters      192 
_refine_ls_number_restraints      0 
_refine_ls_R_factor_all           0.1419 
_refine_ls_R_factor_gt            0.0633 
_refine_ls_wR_factor_ref          0.2148 
_refine_ls_wR_factor_gt           0.1778 
_refine_ls_goodness_of_fit_ref    0.970 
_refine_ls_restrained_S_all       0.970 
_refine_ls_shift/su_max           0.002 
_refine_ls_shift/su_mean          0.000 
  
loop_ 
 _atom_site_label 
 _atom_site_type_symbol 
 _atom_site_fract_x 
 _atom_site_fract_y 
 _atom_site_fract_z 
 _atom_site_U_iso_or_equiv 
 _atom_site_adp_type 
 _atom_site_occupancy 
 _atom_site_symmetry_multiplicity 
 _atom_site_calc_flag 
 _atom_site_refinement_flags 
 _atom_site_disorder_assembly 
 _atom_site_disorder_group 
Yb1 Yb 0.18160(2) 0.07367(2) 0.25408(5) 0.0811(3) Uani 1 1 d . . . 
O1 O 0.0960(3) 0.0094(3) 0.2604(7) 0.084(3) Uani 1 1 d . . . 
N1 N 0.1519(4) -0.0154(4) 0.2508(8) 0.079(3) Uani 1 1 d . . . 
N2 N 0.0634(4) -0.0759(4) 0.2641(10) 0.089(4) Uani 1 1 d . . . 
C1 C 0.2034(6) 0.0568(5) 0.4256(7) 0.154(10) Uani 1 1 d G . . 
H1A H 0.1844 0.0251 0.4618 0.185 Uiso 1 1 calc R . . 
C2 C 0.1970(7) 0.0986(6) 0.4324(10) 0.29(3) Uani 1 1 d G . . 
H2A H 0.1731 0.1017 0.4752 0.349 Uiso 1 1 calc R . . 
C3 C 0.2358(7) 0.1381(6) 0.3816(10) 0.35(4) Uani 1 1 d G . . 
H3A H 0.2442 0.1736 0.3836 0.417 Uiso 1 1 calc R . . 
C4 C 0.2664(6) 0.1206(5) 0.3434(11) 0.29(3) Uani 1 1 d G . . 
H4A H 0.2996 0.1418 0.3134 0.351 Uiso 1 1 calc R . . 
C5 C 0.2463(5) 0.0704(4) 0.3706(9) 0.166(10) Uani 1 1 d G . . 
H5A H 0.2627 0.0500 0.3617 0.199 Uiso 1 1 calc R . . 
C17 C 0.1692(3) -0.0501(3) 0.2417(6) 0.084(4) Uani 1 1 d G . . 
C12 C 0.1661(5) -0.0721(4) 0.1513(7) 0.160(10) Uani 1 1 d G . . 
H12 H 0.1534 -0.0632 0.0988 0.192 Uiso 1 1 calc R . . 
C13 C 0.1823(5) -0.1078(4) 0.1403(9) 0.231(17) Uani 1 1 d G . . 
H13 H 0.1803 -0.1223 0.0806 0.277 Uiso 1 1 calc R . . 
C14 C 0.2016(4) -0.1213(4) 0.2197(10) 0.160(9) Uani 1 1 d G . . 
H14 H 0.2124 -0.1449 0.2125 0.192 Uiso 1 1 calc R . . 
C15 C 0.2047(4) -0.0993(4) 0.3101(9) 0.156(10) Uani 1 1 d G . . 
H15 H 0.2174 -0.1083 0.3626 0.187 Uiso 1 1 calc R . . 
C16 C 0.1885(4) -0.0637(3) 0.3212(6) 0.127(7) Uani 1 1 d G . . 
H16 H 0.1905 -0.0491 0.3809 0.152 Uiso 1 1 calc R . . 
C11 C 0.1049(5) -0.0261(5) 0.2582(11) 0.076(4) Uani 1 1 d . . . 
C18 C 0.0571(9) -0.1259(9) 0.285(2) 0.181(11) Uani 1 1 d . . . 
H18 H 0.0834 -0.1318 0.3001 0.217 Uiso 1 1 calc R . . 
C6 C 0.2040(14) 0.0581(8) 0.0881(16) 0.26(3) Uani 1 1 d G . . 
H6A H 0.2008 0.0261 0.0658 0.312 Uiso 1 1 calc R . . 
C7 C 0.1708(8) 0.0720(16) 0.0754(16) 0.38(5) Uani 1 1 d G . . 
H7A H 0.1386 0.0523 0.0412 0.450 Uiso 1 1 calc R . . 
C8 C 0.1919(17) 0.1197(15) 0.095(2) 0.46(6) Uani 1 1 d G . . 
H8A H 0.1777 0.1415 0.0798 0.557 Uiso 1 1 calc R . . 
C9 C 0.2382(14) 0.1353(9) 0.119(2) 0.24(2) Uani 1 1 d G . . 
H9A H 0.2645 0.1708 0.1285 0.286 Uiso 1 1 calc R . . 
C10 C 0.2457(11) 0.0972(15) 0.115(2) 0.34(3) Uani 1 1 d G . . 
H10A H 0.2787 0.0992 0.1197 0.410 Uiso 1 1 calc R . . 
N3 N -0.0181(4) -0.1376(5) 0.2673(9) 0.092(4) Uani 1 1 d . . . 
C20 C 0.0154(5) -0.0866(5) 0.2612(9) 0.068(3) Uani 1 1 d . . . 
H20 H 0.0056 -0.0623 0.2557 0.082 Uiso 1 1 calc R . . 
C19 C 0.0102(7) -0.1605(7) 0.278(2) 0.170(11) Uani 1 1 d . . . 
H19 H -0.0022 -0.1952 0.2804 0.205 Uiso 1 1 calc R . . 
  
loop_ 
 _atom_site_aniso_label 
 _atom_site_aniso_U_11 
 _atom_site_aniso_U_22 
 _atom_site_aniso_U_33 
 _atom_site_aniso_U_23 
 _atom_site_aniso_U_13 
 _atom_site_aniso_U_12 
Yb1 0.0522(4) 0.0703(5) 0.1172(6) -0.0093(4) -0.0043(3) 0.0280(3) 
O1 0.053(5) 0.067(6) 0.135(8) -0.014(6) -0.002(5) 0.032(5) 
N1 0.046(6) 0.068(7) 0.125(9) -0.012(6) -0.006(6) 0.030(6) 
N2 0.059(7) 0.060(7) 0.155(11) -0.019(7) -0.017(7) 0.036(6) 
C1 0.21(3) 0.123(18) 0.14(2) -0.007(15) -0.043(19) 0.09(2) 
C2 0.30(5) 0.54(8) 0.13(2) -0.19(4) -0.16(3) 0.29(5) 
C3 0.32(6) 0.28(5) 0.46(8) -0.29(5) -0.26(6) 0.17(5) 
C4 0.19(3) 0.17(3) 0.32(4) 0.04(3) -0.17(3) -0.05(3) 
C5 0.13(2) 0.18(3) 0.19(3) -0.02(2) -0.063(18) 0.08(2) 
C17 0.055(8) 0.084(10) 0.117(13) 0.011(9) 0.012(8) 0.037(8) 
C12 0.30(3) 0.19(2) 0.060(11) -0.040(12) -0.021(13) 0.18(2) 
C13 0.48(5) 0.29(3) 0.100(16) 0.005(18) 0.06(2) 0.33(4) 
C14 0.14(2) 0.16(2) 0.22(3) 0.004(19) 0.046(19) 0.100(18) 
C15 0.140(18) 0.107(16) 0.23(3) 0.006(16) -0.089(18) 0.065(15) 
C16 0.167(19) 0.090(13) 0.117(14) 0.010(10) -0.014(13) 0.061(13) 
C11 0.058(9) 0.060(9) 0.109(11) -0.010(8) -0.006(8) 0.030(8) 
C18 0.120(18) 0.129(19) 0.34(3) 0.04(2) 0.02(2) 0.101(16) 
C6 0.35(5) 0.109(19) 0.21(3) -0.014(19) 0.20(4) 0.03(3) 
C7 0.29(5) 0.92(15) 0.089(19) 0.01(4) 0.01(2) 0.43(7) 
C8 0.80(14) 0.59(10) 0.36(7) 0.36(7) 0.46(9) 0.61(11) 
C9 0.31(5) 0.14(2) 0.30(4) 0.11(2) 0.22(4) 0.14(3) 
C10 0.39(7) 0.37(6) 0.41(6) 0.25(6) 0.34(6) 0.31(6) 
N3 0.064(8) 0.079(9) 0.130(11) -0.016(7) -0.003(7) 0.033(7) 
C20 0.071(9) 0.070(9) 0.072(9) -0.011(7) -0.007(7) 0.040(8) 
C19 0.063(12) 0.069(12) 0.38(4) -0.004(17) -0.006(17) 0.032(10) 
  
_geom_special_details 
; 
 All esds (except the esd in the dihedral angle between two l.s. planes) 
 are estimated using the full covariance matrix.  The cell esds are taken 
 into account individually in the estimation of esds in distances, angles 
 and torsion angles; correlations between esds in cell parameters are only 
 used when they are defined by crystal symmetry.  An approximate (isotropic) 
 treatment of cell esds is used for estimating esds involving l.s. planes. 
; 
  
loop_ 
 _geom_bond_atom_site_label_1 
 _geom_bond_atom_site_label_2 
 _geom_bond_distance 
 _geom_bond_site_symmetry_2 
 _geom_bond_publ_flag 
Yb1 O1 2.352(8) . ? 
Yb1 N3 2.377(12) 2 ? 
Yb1 N1 2.393(11) . ? 
Yb1 C7 2.51(2) . ? 
Yb1 C6 2.519(18) . ? 
Yb1 C3 2.547(10) . ? 
Yb1 C8 2.56(2) . ? 
Yb1 C4 2.562(11) . ? 
Yb1 C2 2.569(12) . ? 
Yb1 C10 2.579(18) . ? 
Yb1 C5 2.593(9) . ? 
Yb1 C1 2.598(10) . ? 
O1 C11 1.243(14) . ? 
N1 C11 1.303(15) . ? 
N1 C17 1.400(13) . ? 
N2 C20 1.329(15) . ? 
N2 C11 1.409(16) . ? 
N2 C18 1.46(2) . ? 
C1 C2 1.387(3) . ? 
C1 C5 1.387(3) . ? 
C2 C3 1.387(3) . ? 
C3 C4 1.386(3) . ? 
C4 C5 1.387(3) . ? 
C17 C12 1.407(3) . ? 
C17 C16 1.408(3) . ? 
C12 C13 1.407(3) . ? 
C13 C14 1.407(3) . ? 
C14 C15 1.407(3) . ? 
C15 C16 1.408(3) . ? 
C18 C19 1.28(3) . ? 
C6 C7 1.288(17) . ? 
C6 C10 1.288(17) . ? 
C7 C8 1.288(17) . ? 
C8 C9 1.288(17) . ? 
C9 C10 1.288(17) . ? 
N3 C19 1.36(2) . ? 
N3 C20 1.369(16) . ? 
N3 Yb1 2.377(11) 3 ? 
  
loop_ 
 _geom_angle_atom_site_label_1 
 _geom_angle_atom_site_label_2 
 _geom_angle_atom_site_label_3 
 _geom_angle 
 _geom_angle_site_symmetry_1 
 _geom_angle_site_symmetry_3 
 _geom_angle_publ_flag 
O1 Yb1 N3 76.7(4) . 2 ? 
O1 Yb1 N1 54.9(3) . . ? 
N3 Yb1 N1 131.6(4) 2 . ? 
O1 Yb1 C7 86.6(7) . . ? 
N3 Yb1 C7 89.0(10) 2 . ? 
N1 Yb1 C7 89.2(11) . . ? 
O1 Yb1 C6 99.8(8) . . ? 
N3 Yb1 C6 117.8(9) 2 . ? 
N1 Yb1 C6 75.7(6) . . ? 
C7 Yb1 C6 29.7(4) . . ? 
O1 Yb1 C3 129.6(5) . . ? 
N3 Yb1 C3 80.3(5) 2 . ? 
N1 Yb1 C3 128.2(4) . . ? 
C7 Yb1 C3 137.3(10) . . ? 
C6 Yb1 C3 130.6(9) . . ? 
O1 Yb1 C8 105.6(12) . . ? 
N3 Yb1 C8 72.3(5) 2 . ? 
N1 Yb1 C8 118.5(9) . . ? 
C7 Yb1 C8 29.4(4) . . ? 
C6 Yb1 C8 48.5(6) . . ? 
C3 Yb1 C8 109.1(11) . . ? 
O1 Yb1 C4 146.6(4) . . ? 
N3 Yb1 C4 109.9(5) 2 . ? 
N1 Yb1 C4 110.3(4) . . ? 
C7 Yb1 C4 125.3(7) . . ? 
C6 Yb1 C4 104.9(10) . . ? 
C3 Yb1 C4 31.49(12) . . ? 
C8 Yb1 C4 107.6(12) . . ? 
O1 Yb1 C2 99.9(5) . . ? 
N3 Yb1 C2 79.9(5) 2 . ? 
N1 Yb1 C2 105.3(4) . . ? 
C7 Yb1 C2 165.3(11) . . ? 
C6 Yb1 C2 156.2(10) . . ? 
C3 Yb1 C2 31.45(10) . . ? 
C8 Yb1 C2 136.2(9) . . ? 
C4 Yb1 C2 51.86(17) . . ? 
O1 Yb1 C10 129.0(9) . . ? 
N3 Yb1 C10 117.7(8) 2 . ? 
N1 Yb1 C10 96.0(9) . . ? 
C7 Yb1 C10 48.4(6) . . ? 
C6 Yb1 C10 29.2(4) . . ? 
C3 Yb1 C10 101.4(10) . . ? 
C8 Yb1 C10 47.9(6) . . ? 
C4 Yb1 C10 78.3(9) . . ? 
C2 Yb1 C10 129.8(10) . . ? 
O1 Yb1 C5 119.5(4) . . ? 
N3 Yb1 C5 129.6(4) 2 . ? 
N1 Yb1 C5 80.3(3) . . ? 
C7 Yb1 C5 135.6(7) . . ? 
C6 Yb1 C5 106.5(10) . . ? 
C3 Yb1 C5 51.76(19) . . ? 
C8 Yb1 C5 132.5(11) . . ? 
C4 Yb1 C5 31.20(14) . . ? 
C2 Yb1 C5 51.52(19) . . ? 
C10 Yb1 C5 89.7(8) . . ? 
O1 Yb1 C1 95.1(4) . . ? 
N3 Yb1 C1 108.7(4) 2 . ? 
N1 Yb1 C1 77.4(4) . . ? 
C7 Yb1 C1 162.2(10) . . ? 
C6 Yb1 C1 133.3(9) . . ? 
C3 Yb1 C1 51.70(18) . . ? 
C8 Yb1 C1 158.7(12) . . ? 
C4 Yb1 C1 51.54(19) . . ? 
C2 Yb1 C1 31.12(13) . . ? 
C10 Yb1 C1 120.7(8) . . ? 
C5 Yb1 C1 30.99(13) . . ? 
C11 O1 Yb1 95.1(8) . . ? 
C11 N1 C17 126.6(11) . . ? 
C11 N1 Yb1 91.6(8) . . ? 
C17 N1 Yb1 141.7(7) . . ? 
C20 N2 C11 123.3(12) . . ? 
C20 N2 C18 101.2(13) . . ? 
C11 N2 C18 135.2(14) . . ? 
C2 C1 C5 108.0 . . ? 
C2 C1 Yb1 73.3(2) . . ? 
C5 C1 Yb1 74.3(4) . . ? 
C1 C2 C3 108.0 . . ? 
C1 C2 Yb1 75.6(3) . . ? 
C3 C2 Yb1 73.4(4) . . ? 
C4 C3 C2 108.0 . . ? 
C4 C3 Yb1 74.8(4) . . ? 
C2 C3 Yb1 75.2(4) . . ? 
C3 C4 C5 108.0 . . ? 
C3 C4 Yb1 73.7(3) . . ? 
C5 C4 Yb1 75.7(3) . . ? 
C1 C5 C4 108.0 . . ? 
C1 C5 Yb1 74.7(4) . . ? 
C4 C5 Yb1 73.1(3) . . ? 
N1 C17 C12 118.7(6) . . ? 
N1 C17 C16 121.3(6) . . ? 
C12 C17 C16 120.0 . . ? 
C13 C12 C17 120.0 . . ? 
C12 C13 C14 120.0 . . ? 
C15 C14 C13 120.0 . . ? 
C14 C15 C16 120.0 . . ? 
C17 C16 C15 120.0 . . ? 
O1 C11 N1 118.4(12) . . ? 
O1 C11 N2 117.7(12) . . ? 
N1 C11 N2 123.9(13) . . ? 
O1 C11 Yb1 58.2(7) . . ? 
N1 C11 Yb1 60.2(7) . . ? 
N2 C11 Yb1 175.5(10) . . ? 
C19 C18 N2 110.7(16) . . ? 
C7 C6 C10 108.0 . . ? 
C7 C6 Yb1 74.6(9) . . ? 
C10 C6 Yb1 78.0(9) . . ? 
C8 C7 C6 108.0 . . ? 
C8 C7 Yb1 77.5(8) . . ? 
C6 C7 Yb1 75.7(9) . . ? 
C7 C8 C9 108.0 . . ? 
C7 C8 Yb1 73.0(8) . . ? 
C9 C8 Yb1 77.5(9) . . ? 
C10 C9 C8 108.0 . . ? 
C10 C9 Yb1 74.6(8) . . ? 
C8 C9 Yb1 73.6(8) . . ? 
C9 C10 C6 108.0 . . ? 
C9 C10 Yb1 76.6(8) . . ? 
C6 C10 Yb1 72.8(8) . . ? 
C19 N3 C20 106.6(13) . . ? 
C19 N3 Yb1 124.5(12) . 3 ? 
C20 N3 Yb1 128.9(10) . 3 ? 
N2 C20 N3 112.3(12) . . ? 
C18 C19 N3 108.4(17) . . ? 
  
_diffrn_measured_fraction_theta_max    0.998 
_diffrn_reflns_theta_full              25.01 
_diffrn_measured_fraction_theta_full   0.998 
_refine_diff_density_max    1.402 
_refine_diff_density_min   -0.636 
_refine_diff_density_rms    0.241 
  
